# Supplementary material for: MYC-targeted WDR4 promotes proliferation, metastasis, and sorafenib resistance by inducing CCNB1 translation in hepatocellular carcinoma
Source: PubMed Central journal article supplement (PMC8270967; doi:10.1038/s41419-021-03973-5), 2021-07-09
Supplement: 41419_2021_3973_MOESM2_ESM.pdf [file 41419_2021_3973_MOESM2_ESM.pdf]

**Supplementary Table S1** Correlation between clinicopathological features and WDR4 expression in HCC tumor tissues.

| Characteristics       | Number | WDR4 expression |     | P value        |
|-----------------------|--------|-----------------|-----|----------------|
|                       |        | High            | Low |                |
| Gender                |        |                 |     | 0.1147         |
| Male                  | 45     | 19              | 26  |                |
| Female                | 35     | 21              | 14  |                |
| Age                   |        |                 |     | 0.4912         |
| <65                   | 49     | 26              | 23  |                |
| ≥65                   | 31     | 14              | 17  |                |
| HBV infection         |        |                 |     | 0.4586         |
| No                    | 23     | 10              | 13  |                |
| Yes                   | 57     | 30              | 27  |                |
| AFP                   |        |                 |     | 0.8161         |
| ≤400 (μg/L)           | 29     | 15              | 14  |                |
| >400 (μg/L)           | 51     | 25              | 26  |                |
| Tumor size            |        |                 |     | <b>0.0256*</b> |
| ≤5cm                  | 39     | 15              | 24  |                |
| >5cm                  | 41     | 26              | 15  |                |
| TNM staging           |        |                 |     | <b>0.0015*</b> |
| I-II                  | 46     | 16              | 30  |                |
| III-IV                | 34     | 24              | 10  |                |
| Lymph node metastasis |        |                 |     | <b>0.0222*</b> |
| Absent                | 59     | 25              | 34  |                |
| Present               | 21     | 15              | 6   |                |
| BCLC stage            |        |                 |     | <b>0.0170*</b> |
| Low                   | 54     | 22              | 32  |                |
| High                  | 26     | 18              | 8   |                |
| PVTT                  |        |                 |     | <b>0.0251*</b> |
| NO                    | 38     | 14              | 24  |                |
| YES                   | 42     | 26              | 16  |                |

\*The expression of WDR4 were compared between the tumor tissue and the normal tissue. BCLC, Barcelona Clinic Liver Cancer; PVTT, portal vein tumor thrombus. Bold italics indicate statistically significant values. \*P<0.05

**Supplementary Table S2** Univariate and multivariate analyses of clinicopathological characteristics, and WDR4 with overall survival.

| Characteristics         | Univariate analysis |             |                   | Multivariate analysis |             |               |
|-------------------------|---------------------|-------------|-------------------|-----------------------|-------------|---------------|
|                         | Hazard Ratio        | 95% CI      | P value           | Hazard Ratio          | 95% CI      | P value       |
| Gender                  | 1.662               | 0.983-2.809 | 0.058             |                       |             |               |
| Age                     | 0.749               | 0.437-1.284 | 0.294             |                       |             |               |
| HBV infection           | 1.080               | 0.599-1.946 | 0.798             |                       |             |               |
| AFP ( $\mu\text{g/L}$ ) | 0.892               | 0.517-1.537 | 0.680             |                       |             |               |
| Tumor Size (cm)         | 1.780               | 1.041-3.045 | <b>0.035*</b>     | 1.490                 | 0.839-2.646 | 0.174         |
| TNM staging             | 2.277               | 1.342-3.864 | <b>0.002*</b>     | 1.114                 | 0.534-2.322 | 0.774         |
| Multiple nodules        | 3.482               | 1.884-6.435 | <b>&lt;0.001*</b> | 1.368                 | 0.592-3.161 | 0.463         |
| BCLC stage              | 3.893               | 2.192-6.915 | <b>&lt;0.001*</b> | 2.198                 | 1.010-4.782 | <b>0.047*</b> |
| PVTT                    | 2.735               | 1.535-4.873 | <b>0.001*</b>     | 1.388                 | 0.692-2.783 | 0.355         |
| WDR4                    | 4.097               | 2.163-7.759 | <b>&lt;0.001*</b> | 2.215                 | 1.088-4.513 | <b>0.028*</b> |

HR, Hazard ratio; CI, Confidence interval. Bold italics indicate statistically significant values. \*P<0.05

**Supplementary Table S3** Online analysis website

| website        | URL                                                                                                             |
|----------------|-----------------------------------------------------------------------------------------------------------------|
| GEPIA          | <a href="http://gepia.cancer-pku.cn/">http://gepia.cancer-pku.cn/</a>                                           |
| UALCAN         | <a href="http://ualcan.path.uab.edu/index.html">http://ualcan.path.uab.edu/index.html</a>                       |
| CCLE           | <a href="https://portals.broadinstitute.org/ccle/about">https://portals.broadinstitute.org/ccle/about</a>       |
| cBioPortal     | <a href="https://www.cbioportal.org/">https://www.cbioportal.org/</a>                                           |
| SIFT           | <a href="http://provean.jcvi.org/index.php">http://provean.jcvi.org/index.php</a>                               |
| PolyPhen-2     | <a href="http://genetics.bwh.harvard.edu/pph2/index.shtml">http://genetics.bwh.harvard.edu/pph2/index.shtml</a> |
| GnomAD         | <a href="https://gnomad.broadinstitute.org/">https://gnomad.broadinstitute.org/</a>                             |
| HPA            | <a href="https://www.proteinatlas.org/">https://www.proteinatlas.org/</a>                                       |
| Ubibrowser     | <a href="http://ubibrowser.ncpsb.org.cn/ubibrowser/home">http://ubibrowser.ncpsb.org.cn/ubibrowser/home</a>     |
| TCGA-LIHC      | <a href="https://portal.gdc.cancer.gov/">https://portal.gdc.cancer.gov/</a>                                     |
| GEO(GSE105130) | <a href="https://www.ncbi.nlm.nih.gov/geo/">https://www.ncbi.nlm.nih.gov/geo/</a>                               |

**Supplementary Table S4** Primer sequences, siRNAs and shRNA used in this study.

| Primer name  |   | Sequence (5'-3')       |
|--------------|---|------------------------|
| WDR4         | F | TCTCCAAGTCTGGCCGCTAT   |
|              | R | CGCACCACCATCCTGACACT   |
| CCNB1        | F | GCACTTTCCTCCTTCTCA     |
|              | R | CGATGTGGCATACTTGTT     |
| MYC          | F | GTCAAGAGGCGAACACACAAC  |
|              | R | TTGGACGGACAGGATGTATGC  |
| E-cadherin   | F | CGAGAGCTACACGTTACGG    |
|              | R | GGGTGTCGAGGGAAAAATAGG  |
| N-cadherin   | F | AGCCAACCTTAACTGAGGAGT  |
|              | R | GGCAAGTTGATTGGAGGGATG  |
| Vimentin     | F | GACGCCATCAACACCGAGTT   |
|              | R | CTTTGTCGTTGGTTAGCTGGT  |
| Fibronectin  | F | TTATGACGACGGGAAGACCT   |
|              | R | GCTGGATGGAAAGATTACTC   |
| GAPDH        | F | GGTGAAGGTCGGAGTCAACG   |
|              | R | TGGGTGGAATCATATTGGAACA |
| WDR4 Primer1 | F | GAGGAGTCTGCTATCAAGTAA  |
|              | R | TCACGAGGTCAGGAGATG     |
| WDR4 Primer2 | F | CTGCCAACGCTAATACCA     |
|              | R | TGCCACCTCAATGAATCG     |
| si-NC        |   | UUCUCCGAACGUGUCACGUTT  |
| siWDR4-1     |   | GGACGUGGCUUUCGAGGAG    |
| siWDR4-2     |   | GCAGACAGCAGUUGGUGUA    |
| siCCNB1-1    |   | CCATTATTGATCGGTTTCAT   |
| siCCNB1-2    |   | CCACATCGAAGCATGCTAA    |
| siMYC-1      |   | GAGGUAUCUGGAAGAAUUTT   |
| siMYC-2      |   | GGAACAAGAAGAUGAGGAATT  |
| si EIF2A-1   |   | GAUGUAGUUUGGAAUUCUAGU  |
| si EIF2A-2   |   | GGUGCACCUUCAUUUGUUAGA  |
| shWDR4-1     |   | GCACCGTGTTAAAGAAAGTCT  |
| shWDR4-2     |   | AGAGTTTGTGAGCCGTATCTC  |
| Sh-Ctrl      |   | TTCTCCGAACGTGTCACGT    |

**Supplementary Table S5 Primary antibodies used in this study**

| Antigens          | Manufacturer | Catalog Number | Application                     |
|-------------------|--------------|----------------|---------------------------------|
| WDR4              | Abcam        | ab169526       | 1:1000 for WB;<br>1:500 for IHC |
| WDR4              | Abcam        | ab241297       | IP                              |
| CCNB1             | Proteintech  | 55004-1-AP     | IP                              |
| CCNB1             | Proteintech  | 67686-1-Ig     | 1:1000 for WB                   |
| $\beta$ -actin    | Proteintech  | 66009-1-Ig     | 1:1000 for WB                   |
| GAPDH             | Proteintech  | 60004-1-Ig     | 1:10000 for WB                  |
| MYC               | Proteintech  | 67447-1-Ig     | 1:1000 for WB                   |
| EIF2A             | Proteintech  | 11233-1-AP     | IP                              |
| EIF2A             | Proteintech  | 66482-1-Ig     | 1:1000 for WB                   |
| Fibronectin       | Proteintech  | 15613-1-AP     | 1:1000 for WB;<br>1:500 for IHC |
| Vimentin          | Proteintech  | 10366-1-AP     | 1:1000 for WB;<br>1:500 for IHC |
| E-cadherin        | Proteintech  | 20874-1-AP     | 1:1000 for WB;<br>1:500 for IHC |
| N-cadherin        | Proteintech  | 22018-1-AP     | 1:1000 for WB;<br>1:500 for IHC |
| CDC25             | Proteintech  | 16485-1-AP     | 1:1000 for WB                   |
| P21               | Proteintech  | 10355-1-AP     | 1:1000 for WB                   |
| Caspase 3         | Proteintech  | 19677-1-AP     | 1:1000 for WB                   |
| Caspase 7         | Proteintech  | 27155-1-AP     | 1:1000 for WB                   |
| Caspase 9         | Proteintech  | 10380-1-AP     | 1:1000 for WB                   |
| 7-Methylguanosine | Biovision    | 6655-100       | Me-RIP                          |
| IgG               | Servicebio   | GB23303        | IP                              |
| IgG               | Servicebio   | GB23301        | IP                              |
| HRP               | IPKine       | A25222         | IP                              |
